# Supplementary material
Source: publisher site journal article supplement (https://www.spandidos-publications.com/5352/downloadSupplementary)

Figure S1. Effect of Ly294002 on phosphorylation status of Akt in MSTO-211HAcT cells. Cells were treated with increasing concentrations of Ly294002 (0, 10, 20, 25 and 30  $\mu$ M) for 48 h in RPMI-1640 medium containing 3.8  $\mu$ M lactic acid. The levels of p-Akt and Akt were determined by western blot analysis. The  $\beta$ -actin was used as a loading control. LY, Ly294002; p-, phosphorylated.

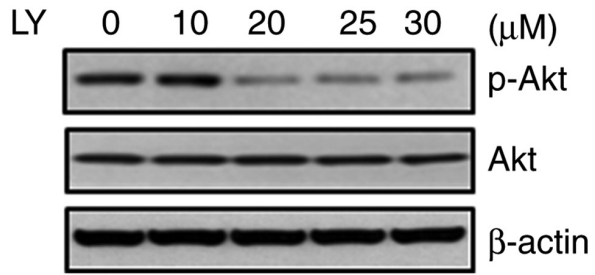

Supplement: Supplementary file 1 [file downloadSupplementary]
